# Supplementary material for: Melanoma-Associated Cancer-Testis Antigen 16 (CT16) Regulates the Expression of Apoptotic and Antiapoptotic Genes and Promotes Cell Survival
Source: PLOS journal article supplement (doi:10.1371/journal.pone.0045382), 2012-09-21
Supplement: S7 (10.1371/journal.pone.0045382.s007) [file journal.pone.0045382.s007]

**Table S1. Comparison of chromatin immunoprecipitation data with differentially regulated genes in transfected WM-266-4 cells**

| <b>Experiment</b>   | <b>cDNA</b> | <b>Sample-specific genes</b> | <b>Common genes with CT16 upregulated genes</b> | <b>Common genes with CT16 downregulated genes</b> |
|---------------------|-------------|------------------------------|-------------------------------------------------|---------------------------------------------------|
| Histone acetylation | CT16        | 202                          | 6                                               | 1                                                 |
| Histone acetylation | Control     | 329                          | 0                                               | 5                                                 |
| DNA methylation     | CT16        | 778                          | 6                                               | 6                                                 |
| DNA methylation     | Control     | 946                          | 2                                               | 6                                                 |
